# Supplementary material for: Derivation and validation of plasma endostatin for predicting renal recovery from acute kidney injury: a prospective validation study
Source: PubMed Central journal article supplement (PMC6240328; doi:10.1186/s13054-018-2232-5), 2018-11-16
Supplement: 13054_2018_2232_MOESM1_ESM.pdf [file 13054_2018_2232_MOESM1_ESM.pdf]

## Supplementary Material

**Table S1** NRI and IDI for assessing the contributions of different biomarkers for non-recovery prediction when combining with clinical risk factors

| Biomarker model                                          | NRI   | <i>P</i> value | IDI   | <i>P</i> value |
|----------------------------------------------------------|-------|----------------|-------|----------------|
| Endostatin-clinical model vs. NGAL-clinical model        | 0.252 | 0.027          | 0.089 | 0.021          |
| Endostatin-clinical model vs. Cystatin C- clinical model | 0.228 | 0.034          | 0.102 | 0.006          |

The predictive value of endostatin-clinical risk model was superior to NGAL- and cystatin C-clinical risk model in predicting non-recovery from AKI. *AKI* acute kidney injury, *NRI* net reclassification improvement, *IDI* integrated discrimination improvement, *NGAL* neutrophil gelatinase-associated lipocalin.

**Table S2** Sensitivity analysis

|                                       | AUC (95 % CI)        | <i>p</i> value |
|---------------------------------------|----------------------|----------------|
| SOFA + AKI stage 1 and 3              | 0.782 (0.661, 0.895) | < 0.001        |
| SOFA                                  | 0.703 (0.589, 0.812) | < 0.001        |
| Endostatin + SOFA + AKI stage 1 and 3 | 0.887 (0.766, 0.958) | < 0.001        |
| Endostatin + SOFA                     | 0.829 (0.701, 0.870) | < 0.001        |
| NGAL + SOFA + AKI stage 1 and 3       | 0.801 (0.707, 0.926) | < 0.001        |
| NGAL + SOFA                           | 0.750 (0.638, 0.857) | < 0.001        |
| Cystatin C + SOFA + AKI stage 1 and 3 | 0.796 (0.678, 0.906) | < 0.001        |
| Cystatin C + SOFA                     | 0.748 (0.629, 0.846) | < 0.001        |

The risk prediction analyses were repeated after removing AKI stage 1 and 3 from the clinical model. The predictive value of the model combining SOFA score and endostatin was identified to be steady and good whether it is with and without AKI stage 1 and 3. *AUC* area under the receiver operating characteristic, *CI* confidence interval, *AKI* acute kidney injury, *SOFA* sequential organ failure assessment, *NGAL* neutrophil gelatinase-associated lipocalin.
